# Supplementary material for: Mechanism Understanding for Size Regulation of Silver Nanowires Mediated by Halogen Ions
Source: MDPI journal article supplement (doi:10.3390/nano12152681), 2022-08-04
Supplement: s1 [file s1]

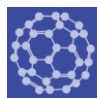

## Supplementary Materials

# Mechanism Understanding for Size Regulation of Silver Nanowires Mediated by Halogen Ions

Ni Xiao <sup>1</sup>, Yanan Chen <sup>2</sup>, Wei Weng <sup>2,3</sup>, Xiaopeng Chi <sup>2,3</sup>, Hang Chen <sup>4,5</sup>, Ding Tang <sup>4,5</sup> and Shuiping Zhong <sup>2,3,4,5,\*</sup>

<sup>1</sup> School of Materials Science and Engineering, Fuzhou University, Fuzhou 350108, China; 18396310297@163.com

<sup>2</sup> Zijin School of Geology and Mining, Fuzhou University, Fuzhou 350108, China; chenyn0926@163.com (Y.C.); wengwei198912@163.com (W.W.); xiaopengchi@fzu.edu.cn (X.C.)

<sup>3</sup> Fujian Key Laboratory of Green Extraction and High-Value Utilization of Energy Metals, Fuzhou University, Fuzhou 350108, China

<sup>4</sup> Zijin Mining Group Co. Ltd., Shanghang, Fujian 364200, China; 18859053970@163.com (H.C.); tang\_ding@163.com (D.T.)

<sup>5</sup> State Key Laboratory of Comprehensive Utilization of Low Grade Refractory Gold Ores, Shanghang, Fujian 364200, China

\* Correspondence: zspcsu@163.com; Tel.: +86-15280385768

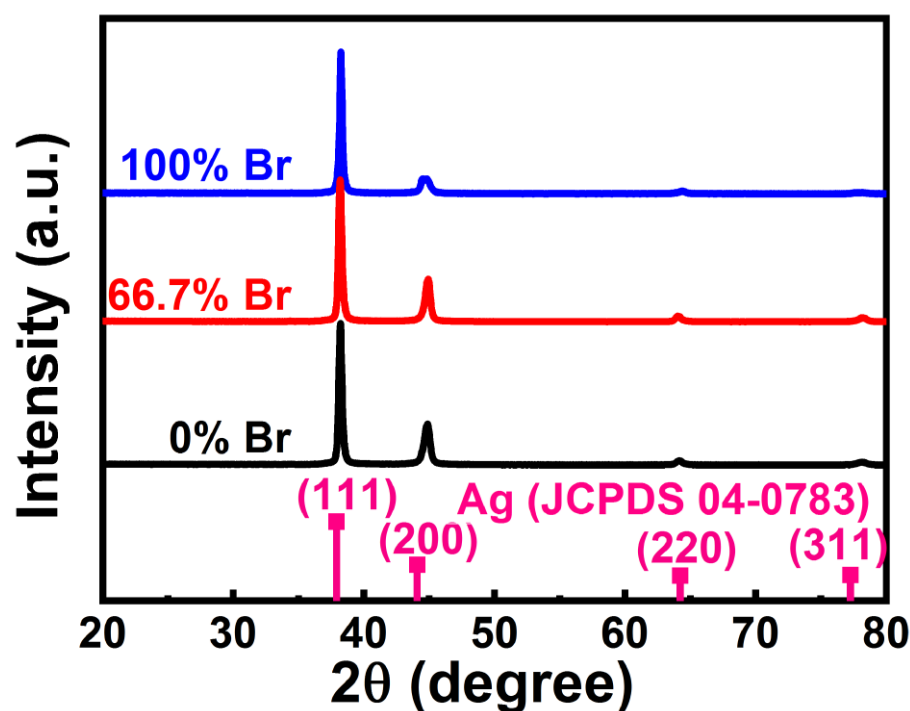

**Figure S1.** XRD pattern of AgNWs synthesized with different halogen composition. All the peaks could be indexed to fcc silver. The blue line, red line and black line represents the synthesis conditions of 100% Br<sup>-</sup>, 66.7% Br<sup>-</sup> and 0% Br<sup>-</sup>, respectively.

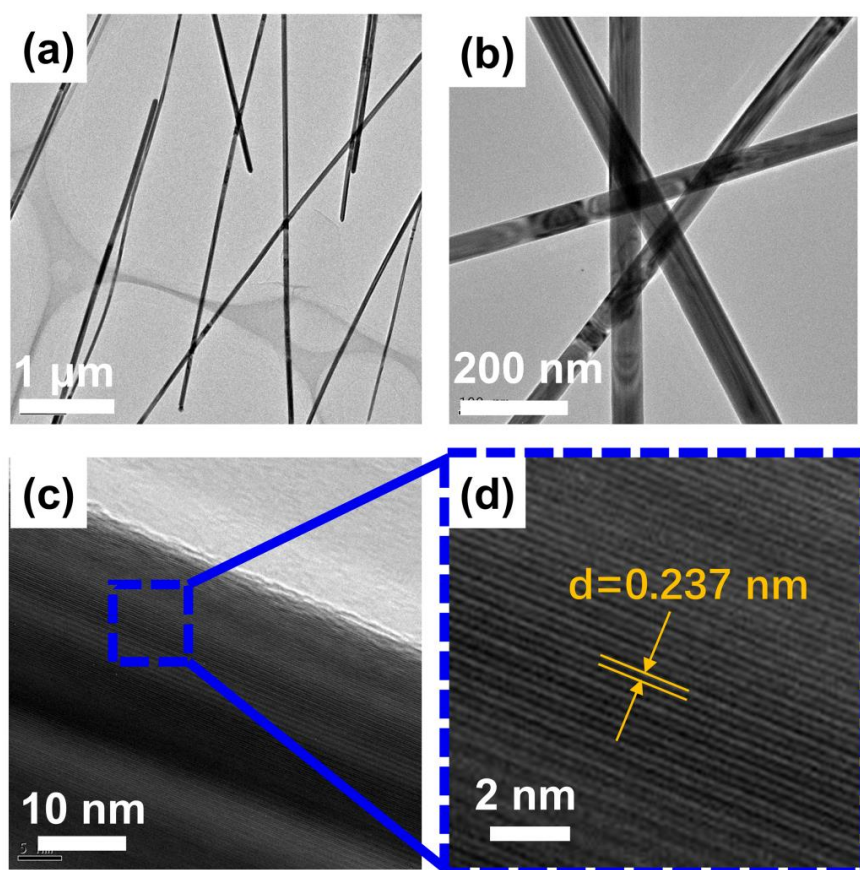

**Figure S2.** TEM images of AgNWs obtained with 66.7% Br<sup>-</sup> and 33.3% Cl<sup>-</sup>. (a,b) Low magnification image of AgNWs; (c) high magnification image of AgNWs; (d) a zoom-in TEM image taken from the marked square area in image (c), demonstrating the lattice fringe with spacing of 0.237 nm.

**Table S1.** The number of valence electrons for different halogens on Ag(100) crystal face in AgNWs.

| Model | Atom | Actual Electron Number | Number of Valence Electrons | Number of Electrons Gained | Total Number of Electrons Gained |
|-------|------|------------------------|-----------------------------|----------------------------|----------------------------------|
| Br-Br | Br1  | 7.4419                 | 7.0000                      | 0.4419                     | 0.8347                           |
|       | Br2  | 7.3928                 | 7.0000                      | 0.3928                     |                                  |
| Br-Cl | Br1  | 7.4384                 | 7.0000                      | 0.4384                     | 0.9490                           |
|       | Cl1  | 7.5106                 | 7.0000                      | 0.5106                     |                                  |
| Cl-Cl | Cl1  | 7.5147                 | 7.0000                      | 0.5147                     | 1.0218                           |
|       | Cl2  | 7.5071                 | 7.0000                      | 0.5071                     |                                  |

**Table S2.** The number of valence electrons for different halogens on Ag(111) crystal face in AgNWs.

| Model | Atom | Actual Electron Number | Number of Valence Electrons | Number of Electrons Gained | Total Number of Electrons Gained |
|-------|------|------------------------|-----------------------------|----------------------------|----------------------------------|
| Br-Br | Br1  | 7.3987                 | 7.0000                      | 0.3987                     | 0.7828                           |
|       | Br2  | 7.3841                 | 7.0000                      | 0.3841                     |                                  |
| Br-Cl | Br1  | 7.4702                 | 7.0000                      | 0.4702                     | 0.9500                           |
|       | Cl1  | 7.4798                 | 7.0000                      | 0.4798                     |                                  |
| Cl-Cl | Cl1  | 7.3952                 | 7.0000                      | 0.3952                     | 0.8801                           |
|       | Cl2  | 7.4849                 | 7.0000                      | 0.4849                     |                                  |
